# Supplementary material for: Methionine adenosyltransferase 1a antisense oligonucleotides activate the liver-brown adipose tissue axis preventing obesity and associated hepatosteatosis
Source: PubMed Central journal article supplement (PMC8888704; doi:10.1038/s41467-022-28749-z), 2022-03-01
Supplement: 41467_2022_28749_MOESM1_ESM.pdf [file 41467_2022_28749_MOESM1_ESM.pdf]

## Supplemental Information

### **Methionine adenosyltransferase 1a antisense oligonucleotides activate the liver-brown adipose tissue axis preventing obesity and associated hepatosteatosis**

Diego Sáenz de Urturi<sup>1</sup>, Xabier Buqué<sup>1,2</sup>, Begoña Porteiro<sup>3</sup>, Cintia Folgueira<sup>4</sup>, Alfonso Mora<sup>4</sup>, Teresa C. Delgado<sup>5</sup>, Endika Prieto-Fernández<sup>6</sup>, Paula Olaizola<sup>7</sup>, Beatriz Gómez-Santos<sup>1</sup>, Maider Apodaka-Biguri<sup>1</sup>, Francisco González-Romero<sup>1</sup>, Ane Nieva-Zuluaga<sup>1</sup>, Mikel Ruiz de Gauna<sup>1</sup>, Naroa Goikoetxea-Usandizaga<sup>5</sup>, Juan Luis García-Rodríguez<sup>1</sup>, Virginia Gutierrez de Juan<sup>5</sup>, Igor Aurrekoetxea<sup>1,2</sup>, Valle Montalvo-Romeral<sup>4</sup>, Eva M. Novoa<sup>3</sup>, Idoia Martín-Guerrero<sup>6</sup>, Marta Varela-Rey<sup>5,8,9</sup>, Sanjay Bhanot<sup>10</sup>, Richard Lee<sup>10</sup>, Jesus M Banales<sup>7,8,11,12</sup>, Wing-Kin Syn<sup>1,13,14</sup>, Guadalupe Sabio<sup>4</sup>, María L. Martínez-Chantar<sup>5,8</sup>, Rubén Nogueiras<sup>3,15,16</sup>, Patricia Aspichueta<sup>1,2,8\*</sup>.

<sup>1</sup>Department of Physiology, Faculty of Medicine and Nursing, University of the Basque Country UPV/EHU, Leioa, Spain.

<sup>2</sup>Biocruces Bizkaia Health Research Institute, Barakaldo, Spain

<sup>3</sup>Department of Physiology, CIMUS, University of Santiago de Compostela-Instituto de Investigación Sanitaria, Santiago de Compostela, Spain.

<sup>4</sup>Myocardial Pathophysiology, Centro Nacional de Investigaciones Cardiovasculares (CNIC), Madrid, Spain.

<sup>5</sup>Liver Disease Laboratory, CIC bioGUNE-BRTA (Basque Research & Technology Alliance), Derio, Spain.

<sup>6</sup>Department of Genetics, Physical Anthropology and Animal Physiology, Faculty of Science and Technology, University of the Basque Country UPV/EHU, Leioa, Spain.

<sup>7</sup>Department of Liver and Gastrointestinal Diseases, Biodonostia Health Research Institute - Donostia University Hospital, University of the Basque Country (UPV/EHU), San Sebastian, Spain.

<sup>8</sup>National Institute for the Study of Liver and Gastrointestinal Diseases (CIBERehd, Instituto de Salud Carlos III), Madrid, Spain.

<sup>9</sup>Gene Regulatory Control in Disease Laboratory, CIMUS, University of Santiago de Compostela-Instituto de Investigación Sanitaria, Santiago de Compostela, Spain

<sup>10</sup>IONIS Pharmaceuticals, Carlsbad, California, USA.

<sup>11</sup>Ikerbasque, Basque Foundation for Science, Bilbao, Spain.

<sup>12</sup>Department of Biochemistry and Genetics, School of Sciences, University of Navarra, Pamplona, Spain.

<sup>13</sup>Section of Gastroenterology, Ralph H Johnson, VAMC, Charleston, USA

<sup>14</sup>Division of Gastroenterology and Hepatology, Medical University of South Carolina, Charleston, USA

<sup>15</sup>CIBER Fisiopatología de la Obesidad y Nutrición (CIBERObn), Santiago de Compostela, Spain.

<sup>16</sup>Galician Agency of Investigation, Xunta de Galicia, Spain.

\*Correspondence: Patricia Aspichueta, Department of Physiology, Faculty of Medicine and Nursing, University of the Basque Country UPV/EHU, Barrio Sarriena s/n, 48940 Leioa, Spain. Phone: +34 946012896; Fax: +34 946015662; e-mail: [patricia.aspichueta@ehu.eus](mailto:patricia.aspichueta@ehu.eus)

**Inventory of Supplemental Information:**

1. Supplemental Tables
2. Supplemental Figures and Figure legends
3. Separate Source data file

**Supplementary Table 1.- Corporal and hepatic and renal function parameters in ASO-treated mice.**

| Parameter          | Normal Range | CD                   | HFD                       | HFD                         |
|--------------------|--------------|----------------------|---------------------------|-----------------------------|
|                    |              | Control ASO<br>(n=5) | Control ASO<br>(n=5)      | <i>Mat1a</i> ASO 2<br>(n=5) |
| ALB<br>(g/l)       | 26 - 54      | 32.8 ± 1.4           | 31.0 ± 1.7                | 30.9 ± 2.3                  |
| ALT<br>(IU/l)      | 22 - 133     | 21.2 ± 3.9           | 45.2 ± 35.4               | 33.0 ± 14.6                 |
| AST<br>(IU/l)      | 46 - 221     | 39.4 ± 7.1           | 54.6 ± 23.4               | 48.2 ± 12.0                 |
| TBIL<br>(mg/dl)    | 0.1 - 0.7    | 0.05 ± 0.02          | 0.03 ± 0.02               | 0.04 ± 0.01                 |
| CRE<br>(mg/dl)     | 0.1 - 1.8    | 0.23 ± 0.04          | 0.21 ± 0.03               | 0.18 ± 0.03                 |
| Urea<br>(mg/dl)    | 4.3 - 153.9  | 47.4 ± 12.6          | 51.2 ± 4.5                | 50.0 ± 8.2                  |
| Body Weight<br>(g) | -            | 30.3 ± 2.1           | 45.3 ± 2.8 <sup>###</sup> | 36.7 ± 2.8 <sup>**</sup>    |
| Liver<br>(g)       | -            | 1.51 ± 0.25          | 1.63 ± 0.29               | 1.28 ± 0.08 <sup>*</sup>    |
| Kidney<br>(g)      | -            | 0.33 ± 0.04          | 0.37 ± 0.02               | 0.31 ± 0.13                 |
| Spleen<br>(g)      | -            | 0.10 ± 0.02          | 0.09 ± 0.01               | 0.11 ± 0.01                 |

2-month-old C57BL/6J mice were fed a chow diet (CD) or a high-fat diet (HFD) for 10 weeks. During the last 4 weeks mice were treated with *Mat1a* antisense oligonucleotide (ASO) 2 (50 mg/kg/week) (n=5) or with control ASO (50 mg/kg/week) (n=5) until sacrifice. Serum albumin (ALB), alanine aminotransferase (ALT), aspartate aminotransferase (AST), total bilirubin (TBIL), creatinine (CRE) and urea; and body, liver, kidney and spleen weight were measured. Values are presented as means ± SD. Statistically significant differences between groups are indicated by \*p<0.05, and \*\*p<0.01 when comparing *Mat1a* ASO vs. control ASO; and by <sup>###</sup>p<0.001 when comparing CD vs HFD (two tailed Student's test). Source data are provided as a Source data file.

**Supplementary Table 2.- Body weight of ASO-treated mice fed a chow diet (CD).**

| Week | Control ASO CD<br>(n=5) (g) | <i>Mat1a</i> ASO CD<br>(n=5) (g) |
|------|-----------------------------|----------------------------------|
| 1    | 25.8 ± 2.5                  | 25.7 ± 1.4                       |
| 2    | 25.0 ± 2.0                  | 25.2 ± 1.3                       |
| 3    | 25.0 ± 1.6                  | 25.4 ± 1.5                       |
| 4    | 25.8 ± 1.8                  | 26.1 ± 1.2                       |
| 5    | 26.3 ± 1.7                  | 26.8 ± 1.5                       |
| 6    | 25.9 ± 2.2                  | 26.8 ± 1.6                       |
| 7    | 26.3 ± 1.8                  | 27.1 ± 1.5                       |
| 8    | 26.4 ± 1.7                  | 27.3 ± 1.5                       |
| 9    | 27.1 ± 1.8                  | 27.1 ± 1.4                       |
| 10   | 27.2 ± 2.2                  | 26.5 ± 2.2                       |

2-month-old C57BL/6J mice were fed a CD for 10 weeks. During the last 4 weeks mice were treated with *Mat1a* antisense oligonucleotide (ASO) (25 mg/kg/week) (n=5) or with control ASO (25 mg/kg/week) (n=5) until sacrifice. Values are presented as means ± SD of grams (g) of body weight. Source data are provided as a Source data file.

**Supplementary Table 3.- Corporal and hepatic and renal function parameters in ASO-treated mice.**

| Parameter       | Normal Range | CD                | HFD                        | HFD                       |
|-----------------|--------------|-------------------|----------------------------|---------------------------|
|                 |              | Control ASO (n=5) | Control ASO (n=5)          | <i>Mat1a</i> ASO (n=5)    |
| ALB (g/l)       | 26 - 54      | 34.6 ± 1.0        | 30.9 ± 1.2 <sup>###</sup>  | 30.8 ± 1.7                |
| ALT (IU/l)      | 22 - 133     | 17.4 ± 2.1        | 43.8 ± 22.1 <sup>#</sup>   | 55.2 ± 21.3               |
| AST (IU/l)      | 46 - 221     | 37.8 ± 2.8        | 51.0 ± 8.6 <sup>#</sup>    | 114.0 ± 42.3 <sup>*</sup> |
| TBIL (mg/dl)    | 0.1 - 0.7    | 0.06 ± 0.01       | 0.04 ± 0.01 <sup>#</sup>   | 0.06 ± 0.00 <sup>*</sup>  |
| CRE (mg/dl)     | 0.1 - 1.8    | 0.19 ± 0.02       | 0.19 ± 0.05                | 0.16 ± 0.03               |
| Urea (mg/dl)    | 4.3 - 153.9  | 40.4 ± 3.2        | 47.0 ± 3.2 <sup>#</sup>    | 57.0 ± 3.0 <sup>***</sup> |
| Body Weight (g) | -            | 30.1 ± 1.5        | 50.5 ± 2.6 <sup>###</sup>  | 29.0 ± 0.8 <sup>***</sup> |
| Liver (g)       | -            | 1.27 ± 0.11       | 1.90 ± 0.30 <sup>###</sup> | 1.50 ± 0.10 <sup>*</sup>  |
| Kidney (g)      | -            | 0.25 ± 0.02       | 0.34 ± 0.03 <sup>###</sup> | 0.31 ± 0.02               |
| Spleen (g)      | -            | 0.08 ± 0.01       | 0.14 ± 0.03 <sup>###</sup> | 0.11 ± 0.01               |

2-month-old C57BL/6J mice were fed a chow diet (CD) or a high-fat diet (HFD) for 16 weeks. During the last 9 weeks mice were treated with *Mat1a* antisense oligonucleotide (ASO) (25 mg/kg/week) (n=5) or with control ASO (25 mg/kg/week) (n=5) until sacrifice. Serum albumin (ALB), alanine aminotransferase (ALT), aspartate aminotransferase (AST), total bilirubin (TBIL), creatinine (CRE) and urea; and body, liver, kidney and spleen weight were measured. Values are presented as means ± SD. Statistically significant differences between groups are indicated by \*p<0.05, and \*\*\*p<0.001 when comparing *Mat1a* ASO vs. control ASO; and by #p<0.05, ##p<0.01 and ###p<0.001 when comparing CD vs HFD (two tailed Student's test). Source data are provided as a Source data file.

**Supplementary Table 4.- Brown adipose tissue epinephrine levels in ASO-treated mice fed with high fat diet (HFD).**

| Control ASO HFD<br>(n=7) (pg/mg) | <i>Mat1a</i> ASO HFD<br>(n=7) (pg/mg) |
|----------------------------------|---------------------------------------|
| 200.0 ± 83.7                     | 130.6 ± 24.7                          |

2-month-old C57BL/6J mice were fed a HFD for 10 weeks. During the last 4 weeks mice were treated with *Mat1a* antisense oligonucleotide (ASO) (25 mg/kg/week) (n=7) or with control ASO (25 mg/kg/week) (n=7) until sacrifice. Values are presented as means ± SD of picograms of hormone per milligrams of tissue (pg/mg). Source data are provided as a Source data file.

**Supplementary Table 5.- Serum fibroblast growth factor (FGF)21 levels in ASO-treated mice fed a chow diet (CD).**

| Control ASO CD<br>(n=5) (ng/ml) | <i>Mat1a</i> ASO CD<br>(n=5) (ng/ml) |
|---------------------------------|--------------------------------------|
| 0.29 ± 0.18                     | 1.19 ± 0.42**                        |

2-month-old C57BL/6J mice were fed a CD for 10 weeks. During the last 4 weeks mice were treated with *Mat1a* antisense oligonucleotide (ASO) (25 mg/kg/week) (n=5) or with control ASO (25 mg/kg/week) (n=5) until sacrifice. Values are presented as means ± SD of nanograms of FGF21 per milliliter of serum (ng/ml). Statistically significant differences between groups are indicated by \*\*p<0.01 when comparing *Mat1a* ASO vs. control ASO. Source data are provided as a Source data file.

**Supplementary Table 6.- Hepatic lipogenic genes expression in ASO-treated mice fed a high fat diet (HFD).**

| Genes                                        | Control ASO HFD<br>(n=5-7) | <i>Mat1a</i> ASO HFD<br>(n=6) |
|----------------------------------------------|----------------------------|-------------------------------|
| Acetyl-CoA carboxylase 1<br>( <i>Acaca</i> ) | 1.00 ± 0.75                | 0.81 ± 0.41                   |
| Acetyl-CoA carboxylase 2<br>( <i>Acacb</i> ) | 1.00 ± 0.24                | 0.95 ± 0.16                   |
| Fatty acid synthase<br>( <i>Fasn</i> )       | 1.00 ± 0.91                | 1.40 ± 1.62                   |

2-month-old C57BL/6J mice were fed a CD for 10 weeks. During the last 4 weeks mice were treated with *Mat1a* antisense oligonucleotide (ASO) (25 mg/kg/week) or with control ASO (25 mg/kg/week) until sacrifice. Acetyl-CoA carboxylase 1 (*Acaca*) (n=6/group), acetyl-CoA carboxylase 2 (*Acacb*) (n=5 for control ASO and 7 for *Mat1a* ASO) and fatty acid synthase (*Fasn*) (n=7 for control ASO and 6 for *Mat1a* ASO) expression was normalized with glyceraldehydes-3-phosphate dehydrogenase (*Gapdh*) expression. Values are presented as means ± SD of fold change respect to control ASO HFD-fed mice (arbitrary units). Source data are provided as a Source data file.



**Supplementary Table 7.** Primary antibodies used for Western Blotting analysis (WB), immunohistochemistry (IHQ) and Chromatin immunoprecipitation (Chip). CST; Cell Signaling Technology. R&D; R&D Systems.

| Target          | Name                                                                 | Manufacturer                       | Catalog No. | Concentration/<br>Quantity | Clone<br>number | Utility  |
|-----------------|----------------------------------------------------------------------|------------------------------------|-------------|----------------------------|-----------------|----------|
| MATI/III        | Methionine adenosyltransferase 1 alpha                               | NOVUS Biologicals                  | NBP1-55120  | 1:1000                     | -               | WB       |
| UCP1            | Uncoupling protein 1                                                 | Abcam                              | ab10983     | 1:2000                     | -               | WB       |
| ATF4            | Activating transcription factor 4                                    | CST                                | 11815       | 1:1000                     | D4B8            | WB       |
| NRF2            | Nuclear factor erythroid 2-related factor 2                          | CST                                | 12721       | 1:1000                     | D1Z9C           | WB       |
| ACC             | Acetyl-CoA carboxylase                                               | CST                                | 3662        | 1:1000                     | -               | WB       |
| p-ACC           | Phospho Acetyl-CoA carboxylase                                       | CST                                | 3661S       | 1:1000                     | -               | WB       |
| FAS             | Fatty acid synthase                                                  | CST                                | 3189        | 1:1000                     | -               | WB       |
| PPAR $\alpha$   | Peroxisome proliferator activated receptor alpha                     | Santa Cruz Biotechnology           | sc-398394   | 1:1000                     | H-2             | WB       |
| PGC1 $\alpha$   | Peroxisome proliferator activated receptor gamma coactivator 1 alpha | Abcam                              | ab54481     | 1:1000                     | -               | WB       |
| CD36            | Scavenger Receptor 36                                                | Abcam                              | ab23680     | 1:1000                     | JC63.1          | WB       |
| LPL             | Lipoprotein Lipase                                                   | Santa Cruz Biotechnology           | sc-373759   | 1:1000                     | F-1             | WB       |
| p38             | Mitogen Activated Protein Kinase p38                                 | CST                                | 2308S       | 1:1000                     | 10A8            | WB       |
| p-p38           | Phospho- Mitogen Activated Protein Kinase p38                        | CST                                | 9211S       | 1:1000                     | -               | WB       |
| S6              | Ribosomal Protein S6                                                 | CST                                | 2317S       | 1:1000                     | 54D2            | WB       |
| p-S6            | Phospho-Ribosomal Protein S6                                         | CST                                | 4857S       | 1:1000                     | 91B2            | WB       |
| PKA             | Protein Kinase A                                                     | CST                                | 4782S       | 1:1000                     | -               | WB       |
| p-PKA           | Phospho-Protein Kinase A                                             | CST                                | 4781S       | 1:1000                     | -               | WB       |
| $\beta$ -Klotho | Beta Klotho                                                          | R&D                                | AF2619      | 1:1000                     | -               | WB       |
| FAB fragment    | FAB fragments anti mouse-IgG                                         | Jackson ImmunoResearch Europe, Ltd | 115-007-003 | 1:50                       | -               | IHQ      |
| F4/80           | F4/80 (Biotinylated)                                                 | Bio-Rad Laboratories Inc           | MCA497BB    | 1:50                       | Cl:A3-1         | IHQ      |
| SUMO1           | small ubiquitin-related modifier-1                                   | Abcam                              | ab32058     | 1:1000                     | Y299            | WB       |
| Tubulin         | Tubulin                                                              | Sigma                              | T4026       | 1:1000                     | TUB2.1          | WB       |
| Transferrin     | Transferrin                                                          | Santa Cruz Biotechnology           | sc-22597    | 1:1000                     | -               | WB       |
| GAPDH           | Glyceraldehyde 3 phosphate dehydrogenase                             | Abcam                              | ab8245      | 1:20000                    | 0411            | WB       |
| Histone H3      | Histone H3                                                           | CST                                | 9715        | 1:1000                     | -               | WB       |
| NRF2            | Nuclear factor erythroid 2-related factor 2                          | CST                                | 12721       | 1 $\mu$ g per sample       | D1Z9C           | Chip, WB |

**Supplementary Table 8.** Oligonucleotides and sequences used for quantitative PCR analysis of mouse gene expression. All oligonucleotides were individually designed. All the oligonucleotides were provided by Invitrogen.

| Gene                                  | Name                                                                 | Forward Primer          | Reverse Primer           |
|---------------------------------------|----------------------------------------------------------------------|-------------------------|--------------------------|
| <i>Mat1a</i>                          | Methionine adenosyltransferase 1 alpha                               | GACACCATCAAGCACATTGG    | ATGCATTCTCGGTCTCATC      |
| <i>Fgf21</i>                          | Fibroblast growth factor 21                                          | GGGAGGATGGAACAGTGGTA    | GCTTTGACACCCAGGATTTG     |
| <i>Cyp4a14</i>                        | Cytochrome P450 4 a 14                                               | GGCAGTGTTCAGTTGGATGA    | GGCGAAAGAAAGTCAGGTTG     |
| <i>Cyp2b9</i>                         | Cytochrome P450 2 b 9                                                | CCCTGTTGCTCCAAAGGACA    | GGGTGTGAGCAGCTACCAAT     |
| <i>Nqo1</i>                           | NAD(P)H dehydrogenase [Quinone] 1                                    | TTCTGTGGCTTCCAGGTCTT    | CGTTTCTTCCATCCTTCCAG     |
| <i>Cgl</i>                            | Glutamate-cysteine ligase                                            | AGCGATTACACCACAAACCAA   | TCCAATGTCAGCCAACCTCA     |
| <i>Gr</i>                             | Glutathione reductase                                                | GCCAACAAAGAGGAAAAGGTG   | AGCATCTCATCACAGCCAATC    |
| <i>Acaca</i>                          | Acetyl-CoA carboxylase alpha                                         | TGGTGCAGAGGTACCGAAGTG   | GTCGTAGTGGCCGTTCTGAAAG   |
| <i>Acacb</i>                          | Acetyl-CoA carboxylase beta                                          | TGCTAATGGGTTGTCCTTCC    | TCTTGATGTGTGCCTGCTTC     |
| <i>Fasn</i>                           | Fatty Acid Synthase                                                  | GATCCTGGAACGAGAACACGAT  | AGAGACGTGTCACTCCTGGACTTG |
| <i>Nrf2</i>                           | Nuclear factor erythroid 2-related factor 2                          | CTACTCCCAGGTTGCCACA     | CGACTCATGGTCATCTACAAATGG |
| <i>Ucp1</i>                           | Uncoupling Protein 1                                                 | ACCTGCCTCTCTCGGAAAC     | TGCCACACCTCCAGTCATTA     |
| <i>Prdm16</i>                         | PR Domain Containing 16                                              | AGGGCAAGAACCATTACACG    | TGAGGTCTGGAGGGGAAGTA     |
| <i>Ppargc1a</i>                       | Peroxisome proliferator activated receptor gamma coactivator 1 alpha | TATGGAGTGACATAGAGTGTGCT | CCACTTCAATCCACCCAGA      |
| <i>Pparg</i>                          | Peroxisome proliferator activated receptor gamma                     | CACTCGCATTCTTTGACATC    | CGCACTTTGGTATTCTTGGAG    |
| <i>Ppara</i>                          | Peroxisome proliferator activated receptor alpha                     | GCAGTGCCCTGAACATCGAG    | CGTCTGATGAGCATGTCACCTGTG |
| <i>Adipoq</i>                         | Adiponectin                                                          | GCCGTTCTTTCACCTACGA     | ACTTGGTCTCCCACCTCCA      |
| <i>ApoC2</i>                          | Apolipoprotein C2                                                    | CTCGGTTCTTCTGGCTCTA     | GGACCTCATTTCCCAACATC     |
| <i>ApoC3</i>                          | Apolipoprotein C3                                                    | GGAGAGGAAGGAAGGGAAGA    | TAGATGGCTGGGTGGTGAG      |
| <i>Bhmt</i>                           | Betaine--Homocysteine S-Methyltransferase                            | CGGAGAAGTTGTGATTGGAGA   | GCCTTTACATAGCCCCTCTTTT   |
| <i>Sahh</i>                           | S-adenosylhomocysteine hydrolase                                     | ATTCTGGATGATGGTGGTGAC   | GTGGGTATTTGGTGTGGATGA    |
| <i>Cbs</i>                            | Cystathionine Beta-Synthase                                          | CGGTGGTGGATAAGTGGTTC    | AGTCCTTCTGTGCGATGAG      |
| <i>Nrf2 - Fgf21 regulatory region</i> | <i>Nrf2</i> binding site in <i>Fgf21</i> regulatory region           | CATCAGAAGTCAGCCATCCA    | AAGCATTCCAGCATTTCCAG     |
| <i>Actb</i>                           | Actin                                                                | ATCGCTGACAGGATGCAGAAG   | TCAGGAGGAGCAATGATCTTGA   |
| <i>Gapdh</i>                          | Glyceraldehyde 3 phosphate dehydrogenase                             | TATGACTCCACTCACGGCAAATT | TCGCTCCTGGAAGATGGTGAT    |

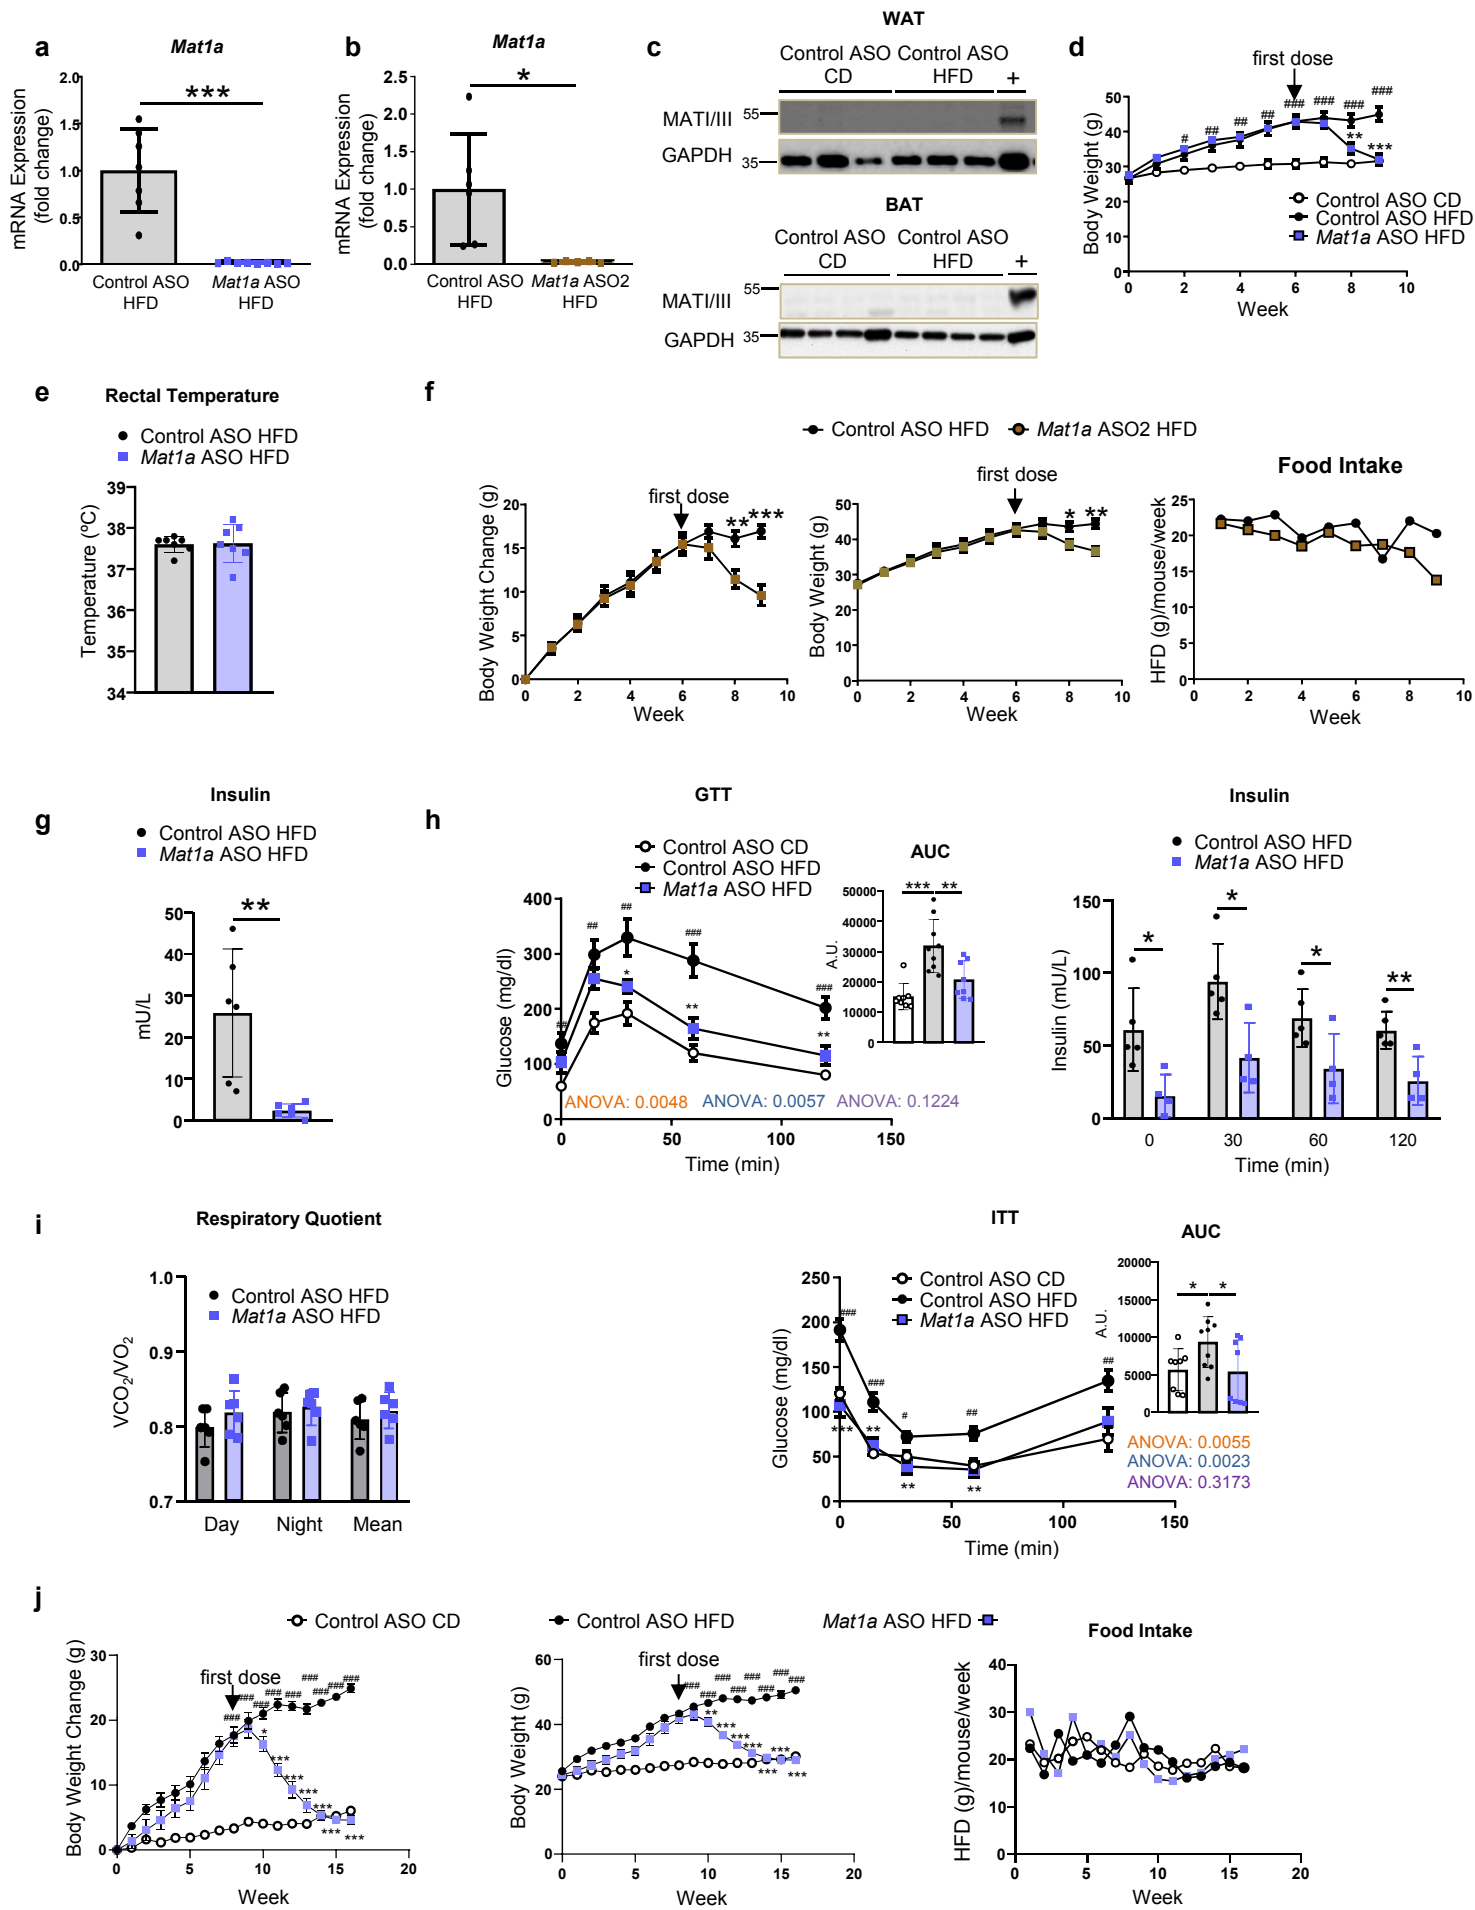

**Supplementary Figure 1. Deficiency in *Mat1a* improves high-fat diet (HFD)-induced obesity.** 2-month-old C57BL/6J mice fed chow diet (CD) or HFD, were treated with *Mat1a* antisense oligonucleotides (ASO) (25 mg/kg/week), *Mat1a* ASO2 (50 mg/kg/week), or control ASO (25 and 50 mg/kg/week) until sacrifice. *Mat1a* mRNA expression normalized with Actin (*Actb*) and glyceraldehyde-3-phosphate dehydrogenase (*Gapdh*) in liver of (a) HFD-fed control (n=7) and *Mat1a* (n=8) ASO-treated mice and (b) control (n=6) and *Mat1a* ASO2 (n=5)-treated mice. (c) Blots of MATI/III and GAPDH in white- (WAT) (n=4) and brown-adipose tissues (BAT) (n=4) of HFD-fed ASO-treated mice. (d) Body weight of CD- (n=6) and HFD-fed control (n=7) and *Mat1a* (n=8) ASO-treated mice. (e) Rectal temperature of HFD-fed control (n=7) and *Mat1a* (n=7) ASO-treated mice. (f) Body weight of HFD-fed control (n=6) and *Mat1a* (n=5) ASO2-treated mice. Food intake (n=1 cage). (g) Serum insulin levels of HFD-fed control (n=6) and *Mat1a* (n=6) ASO-treated mice fasted overnight. (h) Glucose tolerance test (GTT) of CD- (n=8) and HFD-fed control (n=9) and *Mat1a* (n=8) ASO-treated mice at the first week of treatment; insulin serum levels during the GTT of HFD-fed control (n=5) and *Mat1a* (n=4) ASO-treated mice; and insulin tolerance test (ITT) of CD- (n=8) and HFD-fed control (n=9) and *Mat1a* (n=8) ASO-treated mice. Data as area under the curve (AUC). (i) Respiratory Quotient of HFD-fed control (n=6) and *Mat1a* (n=6) ASO-treated mice. (j) Body weight change and body weight of CD- (n=5) and HFD-fed control (n=5) and *Mat1a* (n=5) ASO-treated mice. Food intake during 16 weeks CD- (n=2 cages) and HFD-fed (n=4 cages/group) mice ASO-treated for 9 weeks. Values are means  $\pm$  SEM for time courses, and means  $\pm$  SD for histograms. Statistically significant differences: \* $p < 0.05$ , \*\* $p < 0.01$ , and \*\*\* $p < 0.001$  when comparing Control vs. *Mat1a* ASO HFD; and # $p < 0.05$ , ## $p < 0.01$ , and ### $p < 0.001$  when comparing Control ASO CD vs HFD (two tailed Student's test). Statistical analysis performed by two-way ANOVA test comparing **Control ASO CD vs Control ASO HFD**; **Control ASO HFD vs. *Mat1a* ASO HFD**; **Control ASO CD vs. *Mat1a* ASO HFD** is presented in GTT and ITT curves. Source data are provided as a Source data file.

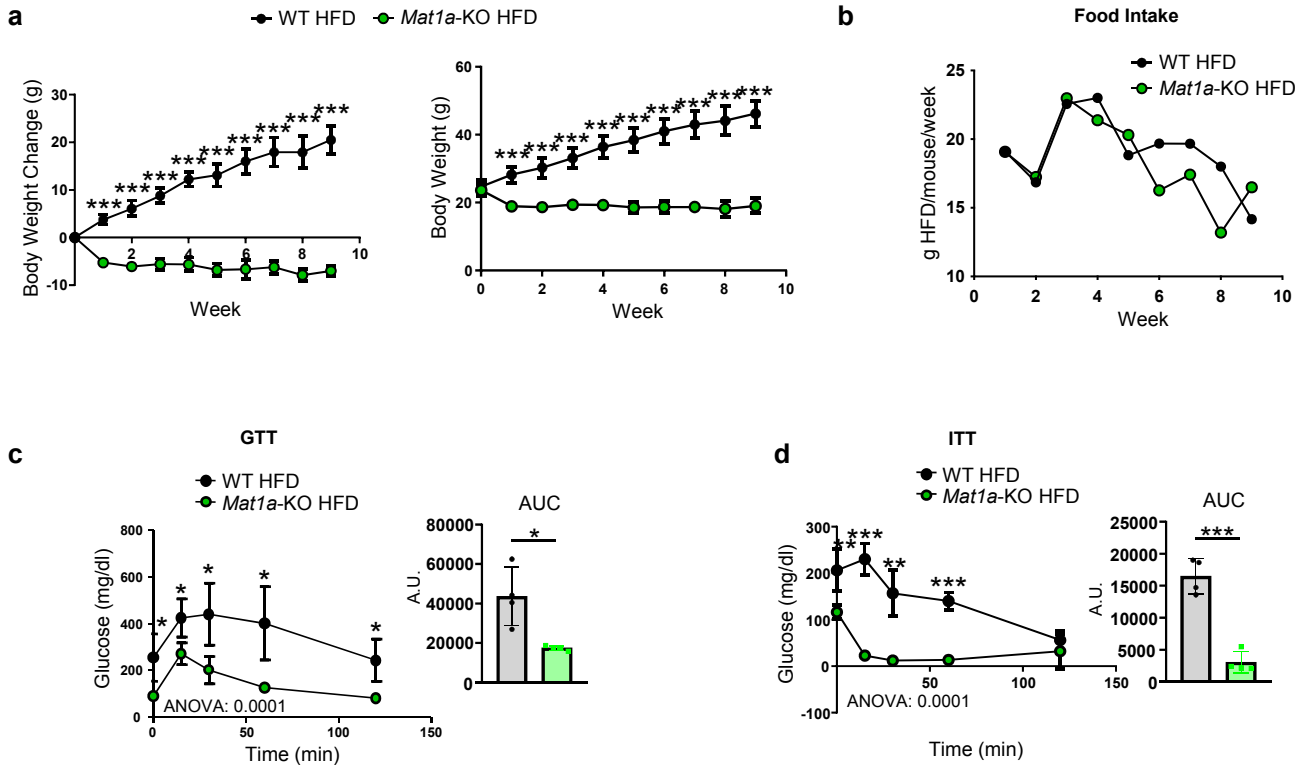

**Supplementary Figure 2. Chronic deficiency in *Mat1a* protects from high-fat diet (HFD)-induced obesity.** 2-month-old *Mat1a*-KO and WT mice were fed HFD for 10 weeks. **(a)** Body weight change and body weight for HFD-fed WT (n=5) and *Mat1a*-KO (n=4) mice. **(b)** Food intake for HFD-fed WT and *Mat1a*-KO mice (n=2 cages). **(c)** Glucose (GTT) and **(d)** insulin tolerance tests (ITT) for HFD-fed WT (n=4) and *Mat1a*-KO (n=4) mice. Data are also indicated as area under the curve (AUC) expressed in arbitrary units (A.U.). Values are presented as means  $\pm$  SEM for time course representations, and as means  $\pm$  SD for histograms. Statistically significant differences between groups are indicated by \* $p < 0.05$ , \*\* $p < 0.01$ , and \*\*\* $p < 0.001$  (two tailed Student's test). Statistical analysis performed by two-way ANOVA test is presented in GTT and ITT curves. Source data are provided as a Source data file.

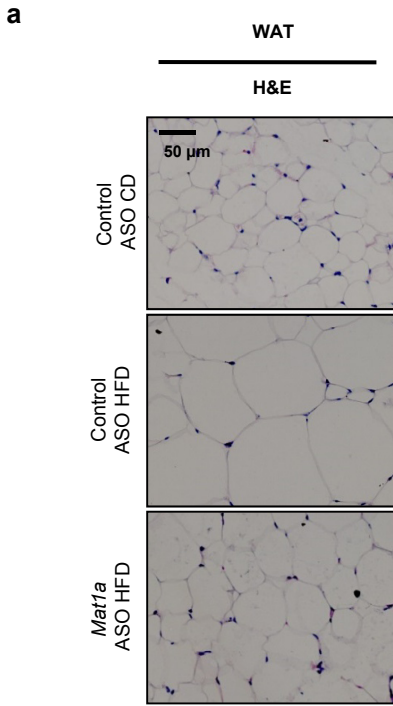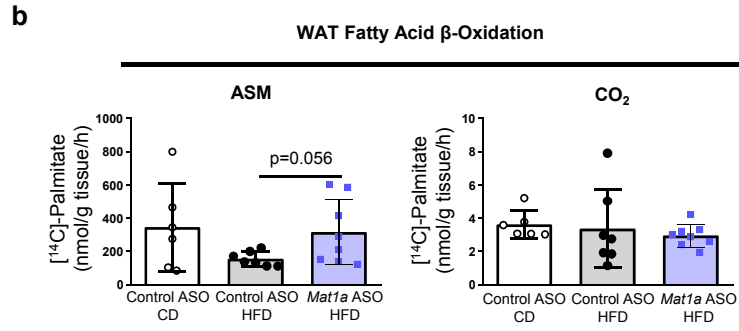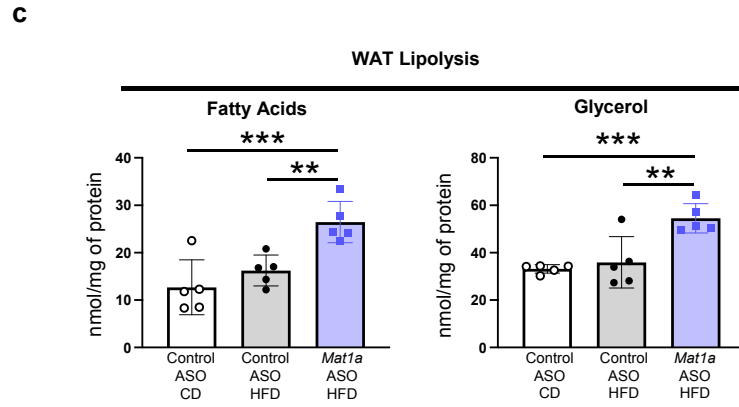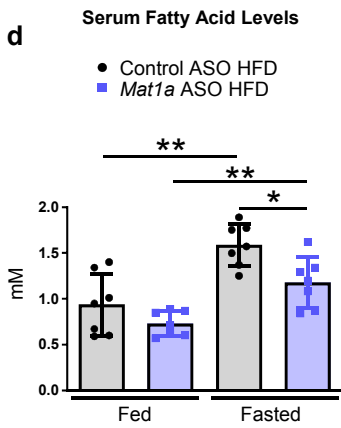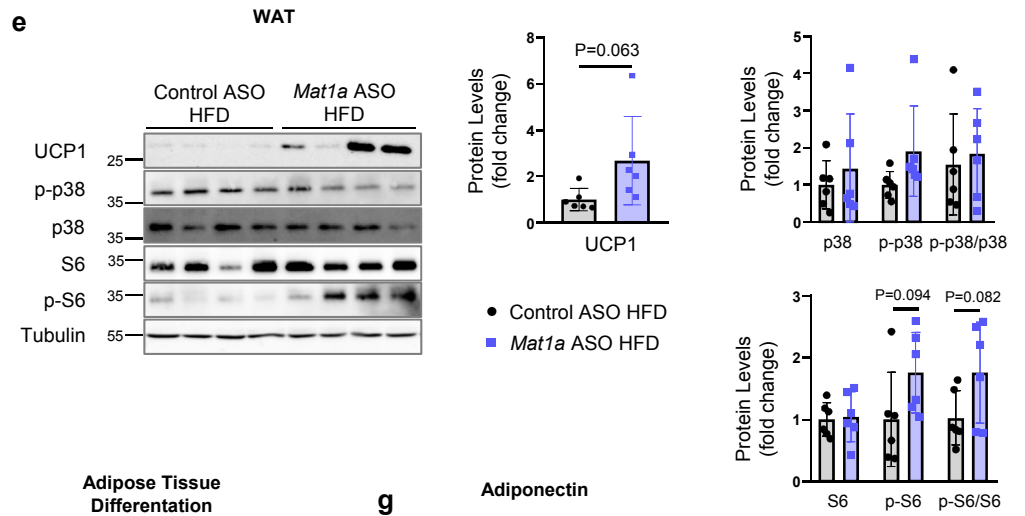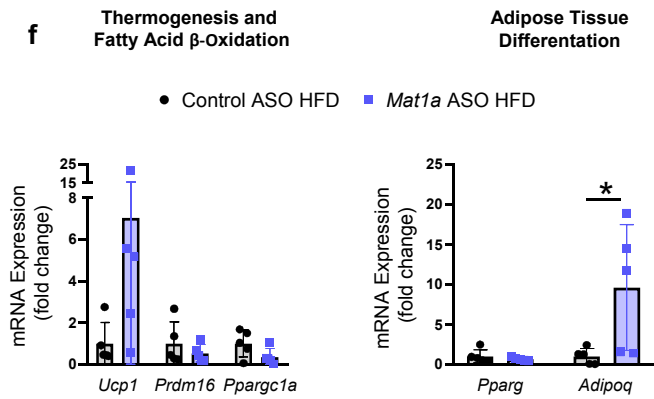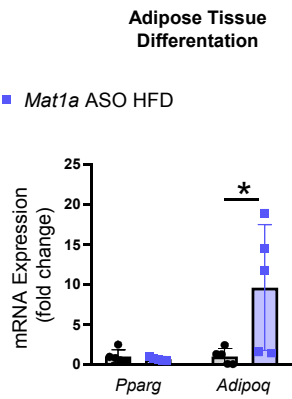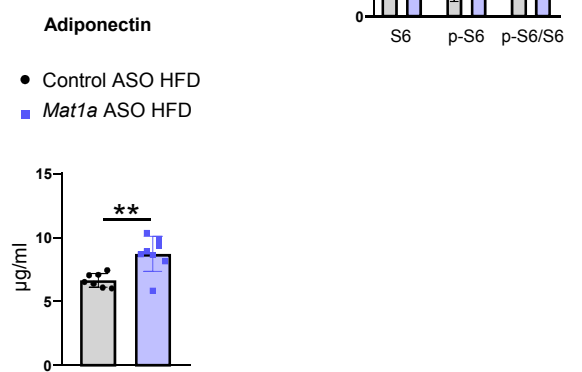

**Supplementary Figure 3. Targeting *Mat1a* during high-fat diet (HFD)-induced obesity induces lipolysis in WAT.** 2-month-old C57BL/6J mice were fed a chow diet (CD) or a high-fat diet (HFD) for 10 weeks. During the last 4 weeks, mice were treated with *Mat1a* antisense oligonucleotides (ASO) or with control ASO (25 mg/kg/week) until sacrifice. **(a)** Representative microphotographs of CD- and HFD-fed ASO-treated mice (n=6/group) WAT sections stained for hematoxylin-eosin (H&E). **(b)** Fatty acid  $\beta$ -oxidation was determined measuring the amount of [<sup>14</sup>C]-acid-soluble metabolites (ASM) (incomplete oxidation of palmitate) and [<sup>14</sup>C]-CO<sub>2</sub> (complete oxidation of palmitate) in WAT from CD- (n=6) and HFD-fed control (n=7) and *Mat1a* (n=8) ASO-treated mice. **(c)** WAT lipolysis was determined by measuring the amount of fatty acids and glycerol secreted *ex vivo* by WAT of CD (n=5) and HFD-fed control (n=5) and *Mat1a* (n=5) ASO-treated mice. **(d)** Serum fatty acid levels in fed and fasted conditions in HFD-fed control (n=7) and *Mat1a* (n=7) ASO-treated mice. **(e)** Representative blots and densitometries of uncoupling protein 1 (UCP1), total and phosphorylated mitogen activated protein kinase p38, total and phosphorylated protein S6 and Tubulin, as representative loading control, in WAT from HFD-fed control (n=6) and *Mat1a* (n=6) ASO-treated mice. **(f)** mRNA expression levels of *Ucp1*, *Prdm16* and *Ppargc1a* and *Pparg* and *Adipoq* in WAT from HFD-fed control (n=5) and *Mat1a* (n=5) ASO-treated mice. **(g)** Serum adiponectin levels in HFD-fed control (n=7) and *Mat1a* (n=8) ASO-treated mice. Values are presented as means  $\pm$  SD. Statistically significant differences between groups are indicated by \*p<0.05, \*\*p<0.01, and \*\*\*p<0.001 (two tailed Student's test). Source data are provided as a Source data file.

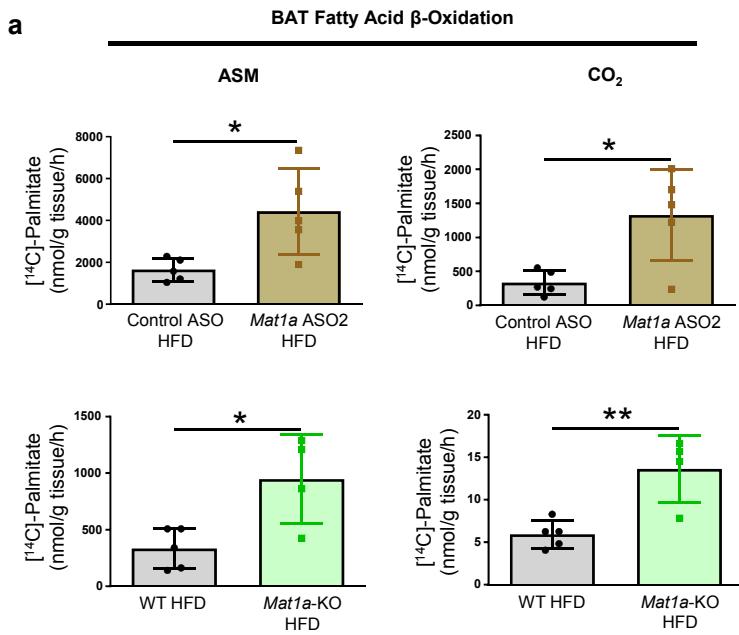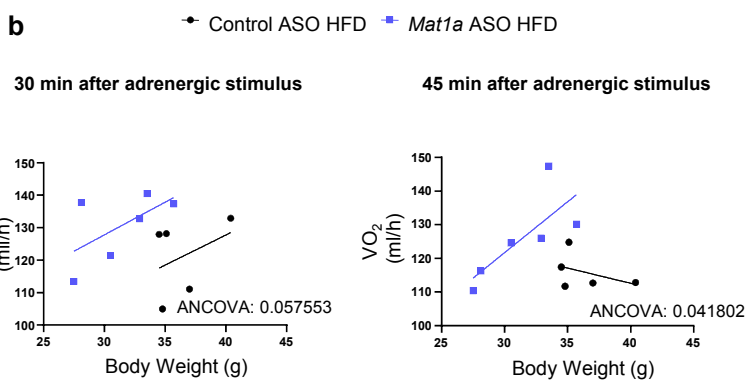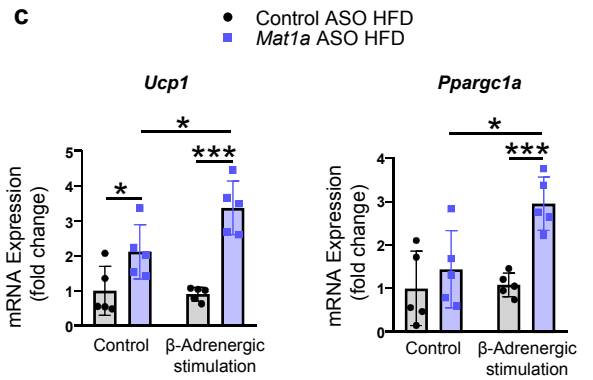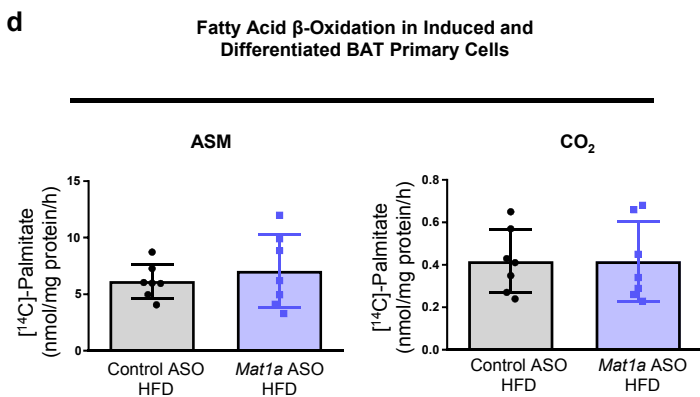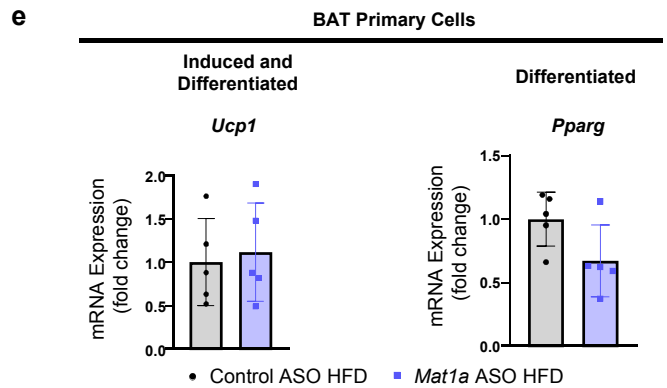



**Supplementary Figure 4. Targeting liver *Mat1a* increases fatty acid oxidation in brown adipose tissue (BAT).** 2-month-old C57BL/6J (C57), WT and *Mat1a*-KO mice were fed a chow diet (CD) or a high-fat diet (HFD) for 10 weeks. During the last 4 weeks, C57 mice were treated with two different *Mat1a* antisense oligonucleotides (ASO), *Mat1a* ASO (25 mg/kg/week) or *Mat1a* ASO2 (50 mg/kg/week) or with control ASO (25 and 50 mg/kg/week) until sacrifice. BAT primary cells were obtained from three independent HFD-fed ASO-treated C57 mice after isolation, growth in culture, induction in some cases and differentiation of adipocyte precursors. **(a)** BAT fatty acid  $\beta$ -oxidation was determined measuring the amount of [ $^{14}$ C]-acid-soluble metabolites (ASM) (incomplete oxidation of palmitate) and [ $^{14}$ C]-CO<sub>2</sub> (complete oxidation of palmitate) in of HFD-fed control (n=5) and *Mat1a* (n=5) ASO2-treated mice and HFD-fed WT (n=5) and *Mat1a*-KO (n=4) mice. **(b)** Oxygen consumption of HFD-fed control (n=5) and *Mat1a* (n=6) ASO-treated C57 mice after 30 or 45 minutes of a  $\beta$ -adrenergic stimulation. **(c)** *Ucp1* and *Ppargc1a* mRNA expression levels in BAT of HFD-fed ASO-treated mice with or without  $\beta$ -adrenergic stimulation (n=5/group). **(d)** Fatty acid  $\beta$ -oxidation was determined measuring the amount of [ $^{14}$ C]-ASM and [ $^{14}$ C]-CO<sub>2</sub> in induced and differentiated BAT primary cells (n=7/group) from HFD-fed ASO-treated mice. **(e)** *Ucp1* and *Pparg* mRNA expression levels in induced and differentiated and only differentiated BAT primary cells (n=5/group). Values are presented as means  $\pm$  SD. Statistically significant differences between groups are indicated by \*p<0.05, \*\*p<0.01, and \*\*\*p<0.001 (two tailed Student's test). Statistical analysis performed by two-way ANCOVA test is presented in oxygen consumption graphs. Source data are provided as a Source data file.

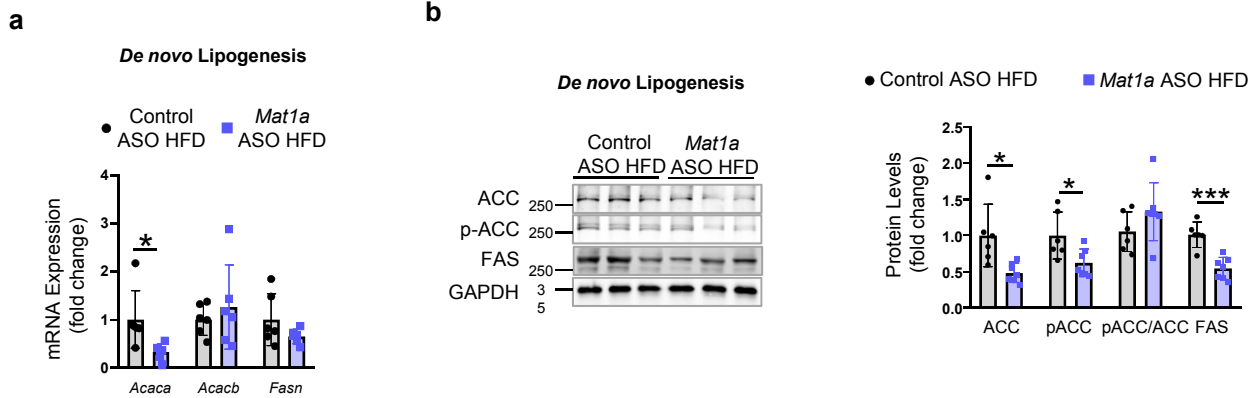

**Supplementary Figure 5. Targeting liver *Mat1a* during high-fat diet (HFD)-induced obesity decreases levels of proteins involved in the *de novo* lipogenesis in BAT.** 2-month-old C57BL/6J mice were fed a high-fat diet (HFD) for 10 weeks. During the last 4 weeks, mice were treated with *Mat1a* antisense oligonucleotides (ASO) or with control ASO (25 mg/kg/week) until sacrifice. **(a)** Acetyl-CoA carboxylase (ACC) 1 (*Acaca*), ACC2 (*Acacb*) and fatty acid synthase (*Fasn*) mRNA expression levels in BAT from HFD-fed control (n=6) and *Mat1a* (n=6) ASO-treated mice. Results were normalized with actin (*Actb*). **(b)** Representative blots and densitometries of total and phosphorylated ACC, FAS and GAPDH in BAT from HFD-fed control (n=6) and *Mat1a* (n=7) ASO-treated mice. The ratio between phosphorylated and total ACC was also determined. Values are presented as means  $\pm$  SD. Statistically significant differences between groups are indicated by \* $p < 0.05$  and \*\*\* $p < 0.001$  (two tailed Student's test). Source data are provided as a Source data file.

**a**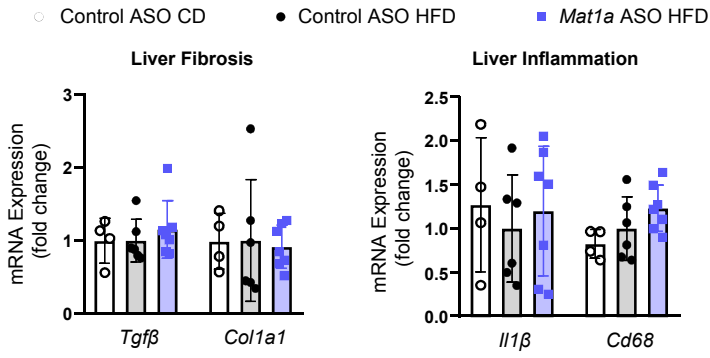**b**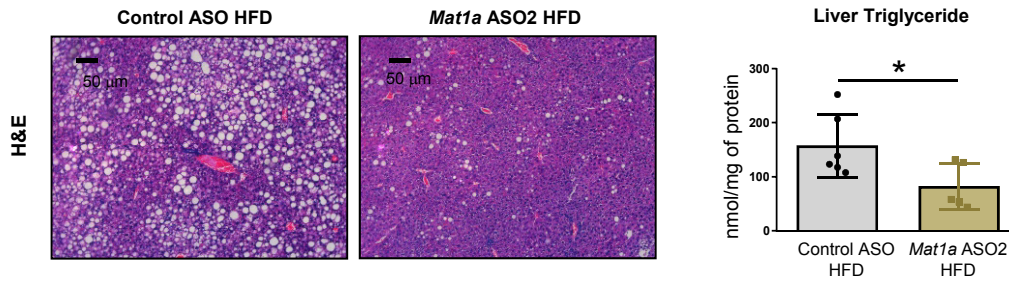**c**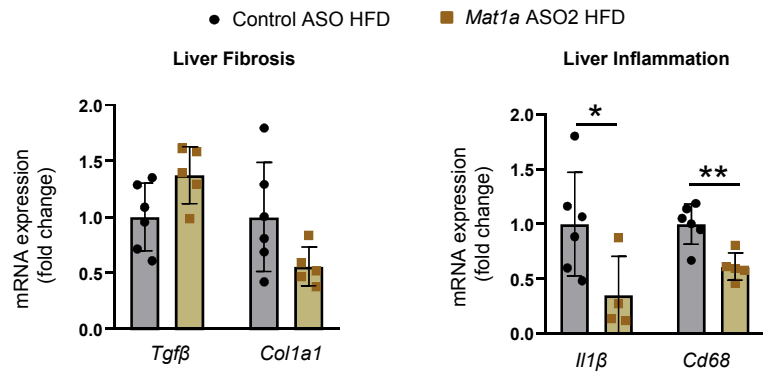**d**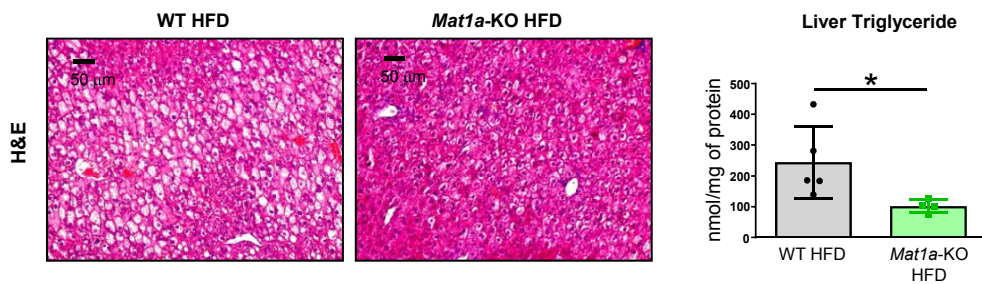

**Supplementary Figure 6. *Mat1a* deficiency prevents from HFD-induced liver triglyceride storage** 2-month-old C57BL/6J (C57), WT and *Mat1a*-KO mice were fed a high-fat diet (HFD) for 10 weeks. During the last 4 weeks, C57 mice were treated with *Mat1a* antisense oligonucleotides (ASO) (25 mg/kg/week), *Mat1a* ASO2 (50 mg/kg/week), or with control ASO (25 and 50 mg/kg/week) until sacrifice. **(a)** Transforming growth factor beta (*Tgfb*) and collagen type 1 alpha 1 (*Colla1*), as liver fibrosis markers, and interleukin 1 beta (*Il1b*) and cluster of differentiation 68 (*Cd68*), as liver inflammation markers, mRNA expression levels in CD- (n=4) and HFD-fed control (n=6) and *Mat1a* (n=7) ASO-treated mice. Results were normalized with actin (*Actb*). **(b)** Representative liver sections stained with hematoxylin-eosin (H&E) and liver triglyceride (TG) content of HFD-fed control (n=6) and *Mat1a* (n=5) ASO2-treated mice. **(c)** *Tgfb* and *Colla1* and *Il1b* and *Cd68* mRNA expression levels in HFD-fed control (n=6) and *Mat1a* (n=5; n=4 for *Il1b*) ASO2-treated mice. Results were normalized with actin (*Actb*). **(d)** Representative liver sections stained with H&E and liver TG content of HFD-fed WT (n=5) and *Mat1a*-KO (n=4) mice. Values are presented as means  $\pm$  SD. Statistically significant differences between groups are indicated by \* $p < 0.05$ , and \*\* $p < 0.01$  (two tailed Student's test). Source data are provided as a Source data file.

**a** Muscle Triglyceride

- Control ASO HFD
- *Mat1a* ASO HFD

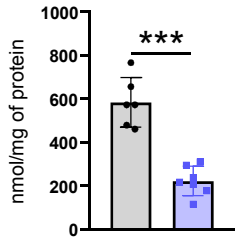

**Supplementary Figure 7. *Mat1a* deficiency prevents from HFD-induced muscle triglyceride storage** 2-month-old C57BL/6J mice were fed a high-fat diet (HFD) for 10 weeks. During the last 4 weeks, mice were treated with *Mat1a* antisense oligonucleotide (ASO) or with control ASO (25 mg/kg/week) until sacrifice. **(a)** Muscle triglyceride content of HFD-fed control (n=6) and *Mat1a* (n=7) ASO-treated mice. Values are presented as means  $\pm$  SD. Statistically significant differences between groups are indicated by \*\*\*p<0.001 (two tailed Student's test). Source data are provided as a Source data file.

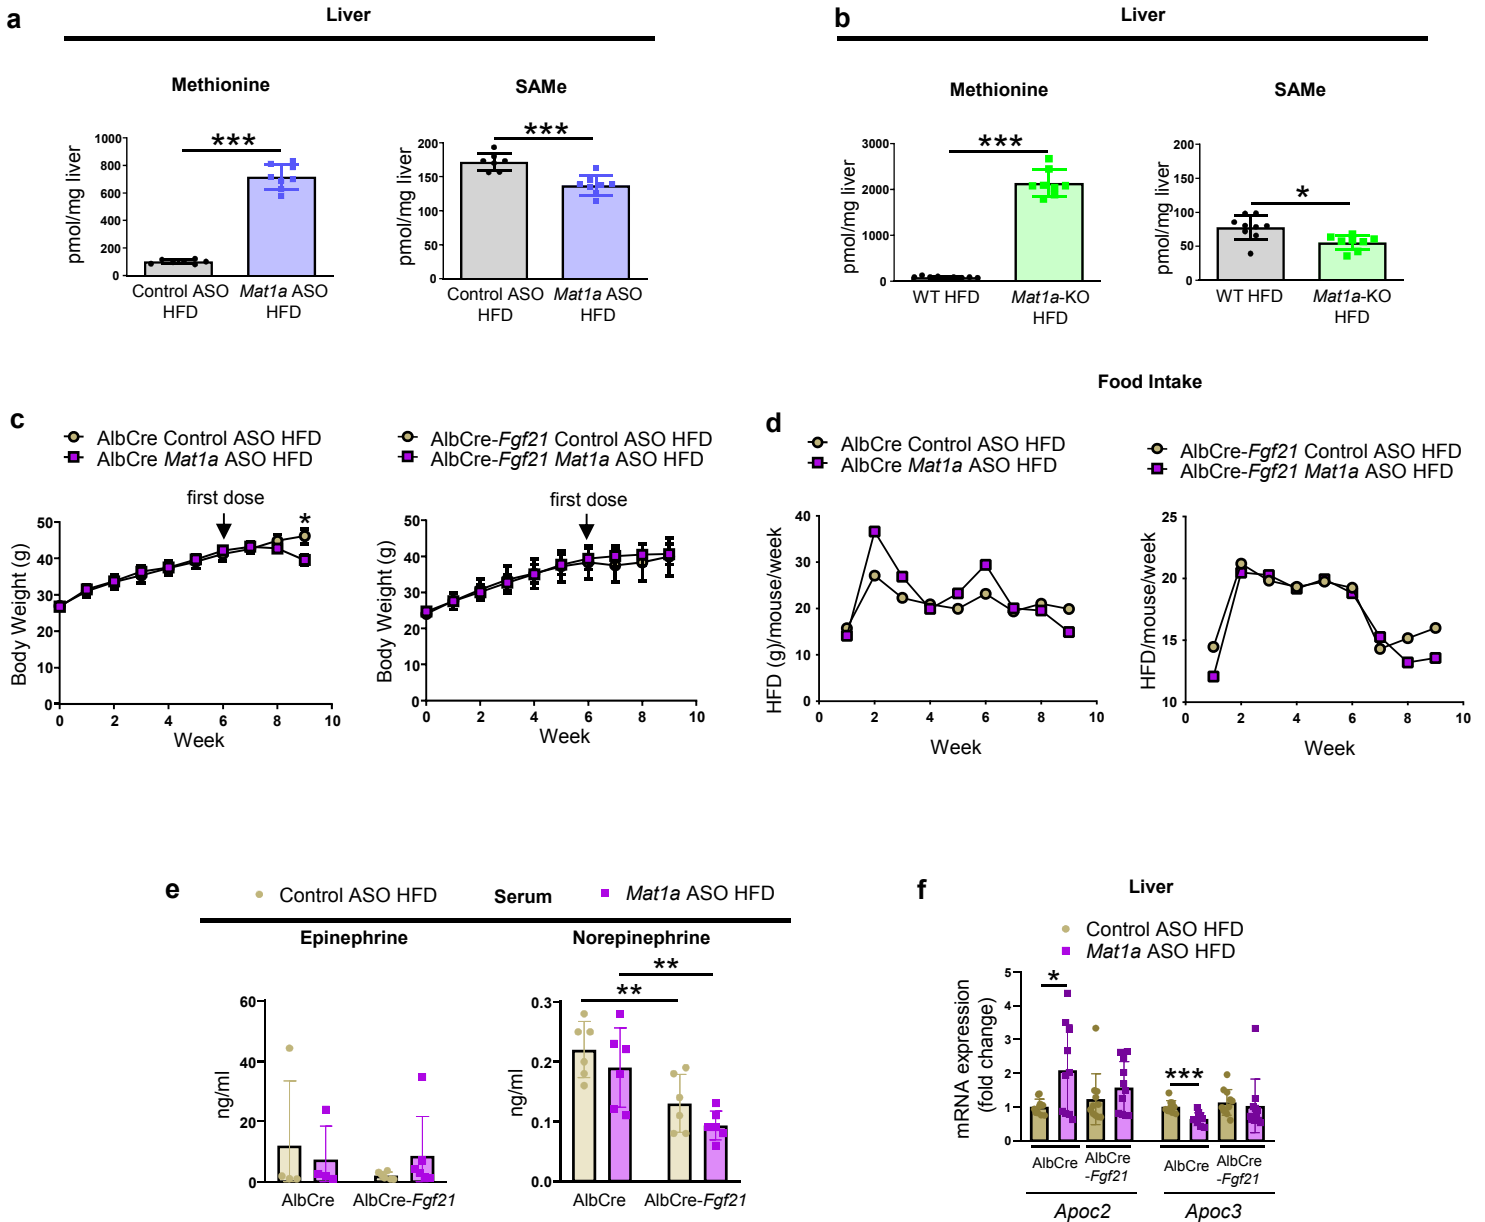

**Supplementary Figure 8. Targeting liver *Mat1a* in hepatocyte specific *Fgf21*-KO prevents the altered apoC expression.** 2-month-old C57BL/6J (C57), WT, *Mat1a*-KO, AlbCre and AlbCre-*Fgf21* were fed a high-fat diet (HFD) for 10 weeks. During the last 4 weeks, C57, AlbCre and AlbCre-*Fgf21* mice were treated with *Mat1a* antisense oligonucleotides (ASO) or with control ASO (25 mg/kg/week) until sacrifice. **(a)** Liver methionine and S-adenosylmethionine (SAME) levels of HFD-fed control (n=7) and *Mat1a* (n=8) ASO-treated mice. **(b)** Liver methionine and SAME levels of HFD-fed WT (n=9) and *Mat1a*-KO (n=8) mice. **(c)** Body weight for HFD-fed control (n=5 and 6) and *Mat1a* (n=5 and 7) ASO-treated AlbCre and AlbCre-*Fgf21* mice, respectively. **(d)** Food intake for HFD-fed control ASO-treated AlbCre and AlbCre-*Fgf21* mice (n=2 cages/group) and *Mat1a* ASO-treated AlbCre (n=2 cages) and AlbCre-*Fgf21* (n=3 cages) mice. **(e)** Serum epinephrine and norepinephrine levels in HFD-fed control ASO-treated AlbCre (n=4 and 6, respectively) and AlbCre-*Fgf21* (n=4 and 6, respectively) mice and *Mat1a* ASO treated AlbCre (n=6/group) and AlbCre-*Fgf21* (n=6/group) mice. **(f)** Liver *Apoc2* and *Apoc3* mRNA expression levels in HFD-fed control (n=10 and 11) and *Mat1a* (n=10 and 11) ASO-treated AlbCre and AlbCre-*Fgf21* mice, respectively. Values are presented as means  $\pm$  SD. Statistically significant differences between groups are indicated by \*  $p < 0.05$ , \*\*  $p < 0.01$ , \*\*\*  $p < 0.001$  (two tailed Student's test). Source data are provided as a Source data file.

BAT

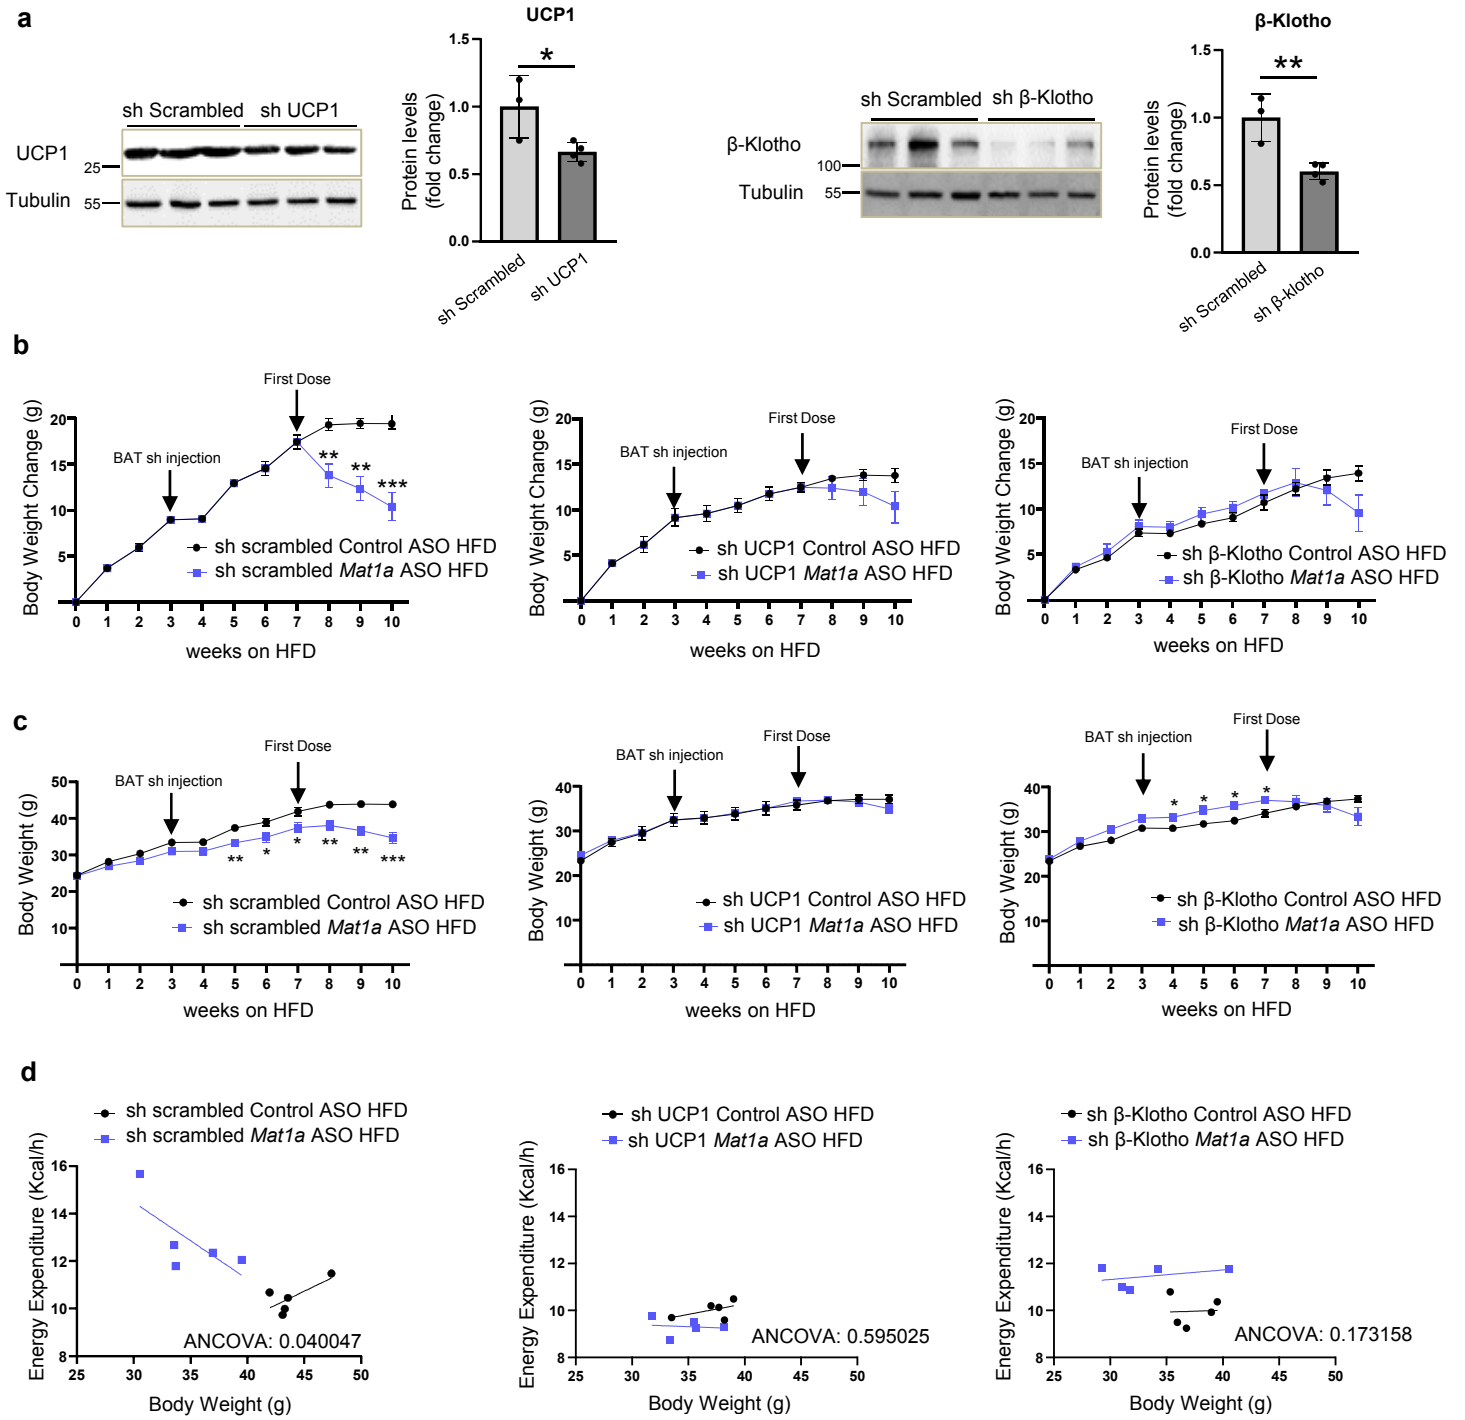

Locomotor Activity

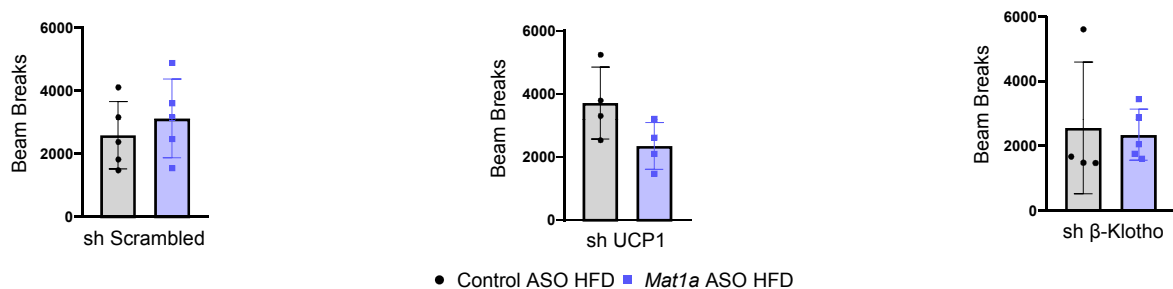

**Supplementary Figure 9. UCP1 and B-klotho are involved in the *Mat1a* antisense oligonucleotide (ASO) induced brown adipose tissue (BAT) thermogenesis.** 2-month-old C57BL/6J mice were treated with lentiviruses containing short hairpin (sh) RNAs against UCP1 (sh UCP1) or against  $\beta$ -Klotho (sh  $\beta$ -Klotho) and fed a high-fat diet (HFD) for 10 weeks. Sh Scrambled were used as control. During the last 4 weeks, mice were treated with a *Mat1a* antisense oligonucleotides (ASO) or with control ASO (25 mg/kg/week) until sacrifice. **(a)** Representative blots and densitometries of UCP1,  $\beta$ -Klotho and tubulin in BAT from HFD-fed mice after lentiviruses treatments (n=3 for sh scrambled, and 4 for sh UCP1 and sh  $\beta$ -Klotho). **(b)** Body weight change in sh Scramble HFD-fed ASO-treated mice, in sh UCP1 HFD-fed ASO-treated mice, and in sh  $\beta$ -Klotho HFD-fed ASO-treated mice (n=5 for each group). **(c)** Body weight in sh Scramble HFD-fed ASO-treated mice, in sh UCP1 HFD-fed ASO-treated mice and in sh  $\beta$ -Klotho HFD-fed ASO-treated mice (n=5 for each group). **(d)** Energy expenditure in sh Scramble HFD-fed ASO-treated mice, in sh UCP1 HFD-fed ASO-treated mice and in sh  $\beta$ -Klotho HFD-fed ASO-treated mice (n=5 for each group). **(e)** Locomotor activity in sh Scrambled (n=5/group), sh UCP1 (n=4/group) and sh  $\beta$ -Klotho (Control ASO HFD n=4; *Mat1a* ASO HFD n=5) HFD-fed ASO-treated mice. Values are presented as means  $\pm$  SEM for time course representations, and as means  $\pm$  SD for histograms. Statistically significant differences between groups are indicated by \*p<0.05, \*\*p<0.01, and \*\*\*p<0.001 (two tailed Student's test). Statistical analysis performed by two-way ANCOVA test is presented in energy expenditure experiments. Source data are provided as a Source data file.



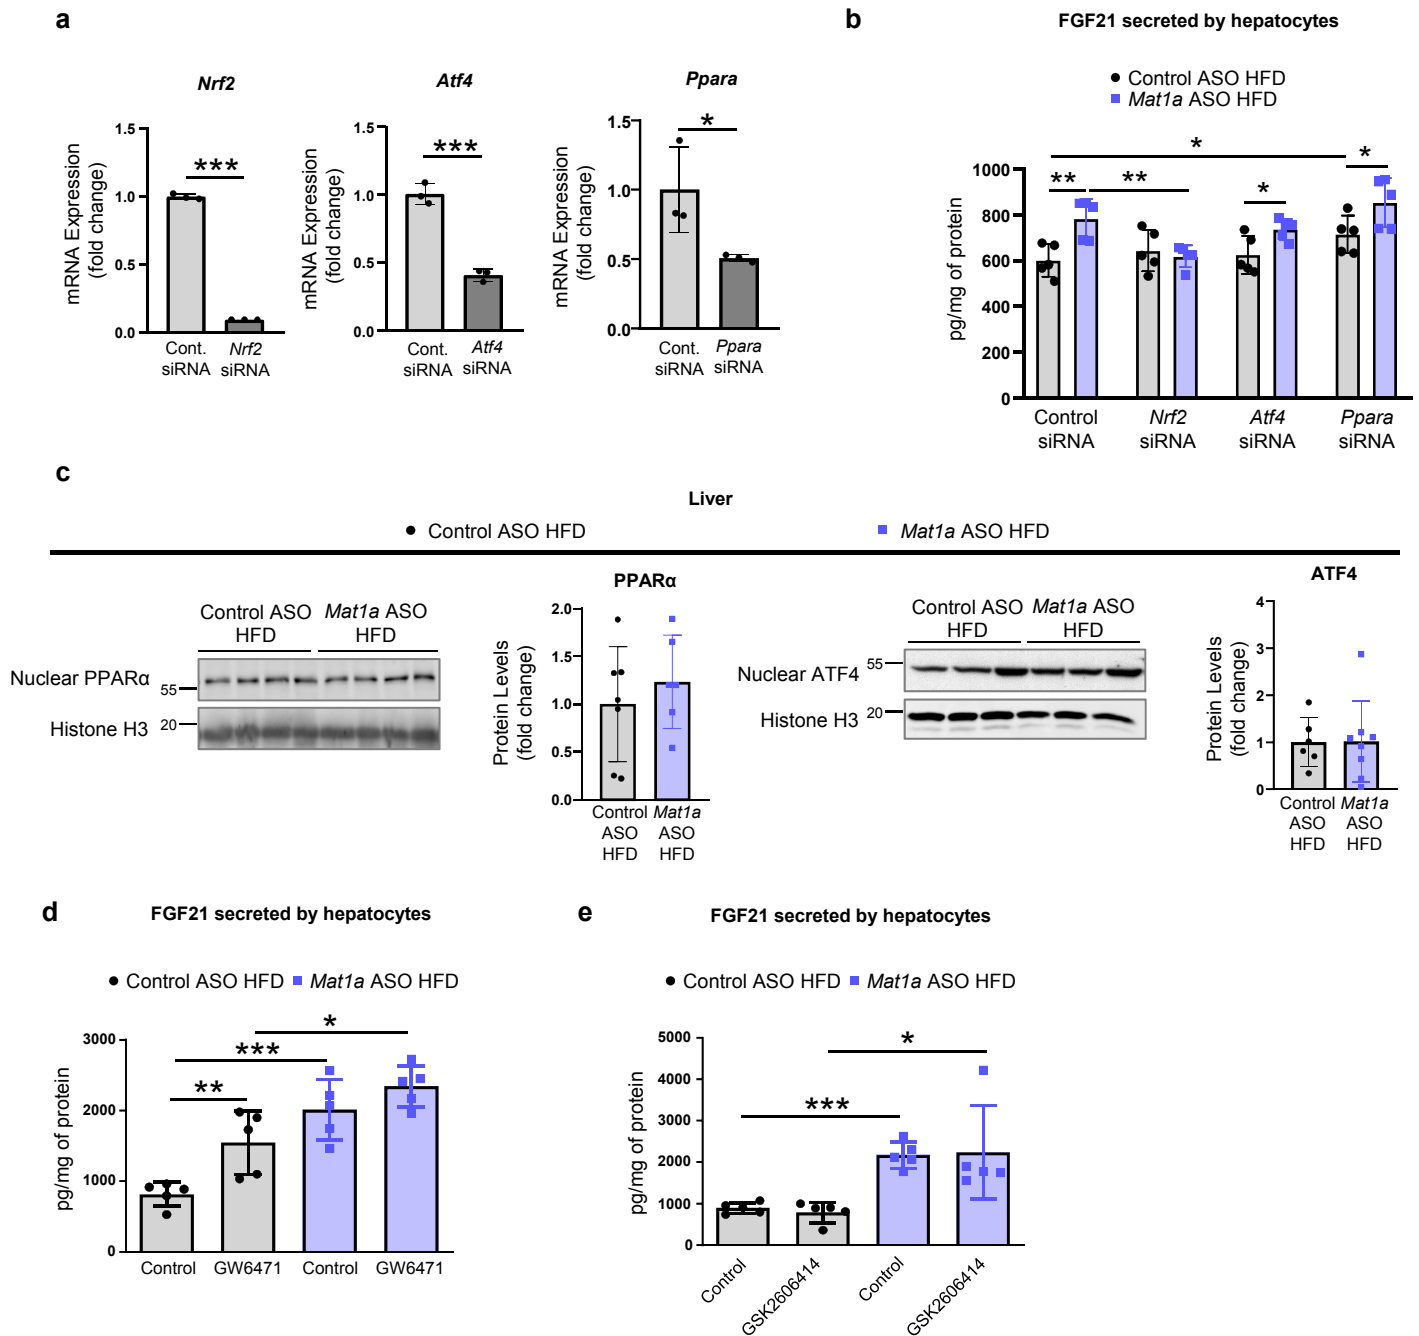

**Supplementary Figure 10. *Mat1a* antisense oligonucleotide (ASO)-driven FGF21 increased secretion is not driven by PPAR $\alpha$  or by altered unfolded protein response.** 2-month-old C57BL/6J mice were fed a high-fat diet (HFD) for 10 weeks. During the last 4 weeks mice were treated with *Mat1a* antisense oligonucleotide (ASO) or with control ASO (25 mg/kg/week) until sacrifice. Hepatocytes from three different HFD-fed ASO-treated mice were isolated, seeded ( $10^6$  or 75000 cells/well) to be treated with siRNAs. **(a)** Nuclear factor erythroid 2-related factor 2 (*Nrf2*), activating transcription factor 4 (*Atf4*) and peroxisome proliferator activated receptor alpha (*Ppara*) mRNA expression levels in hepatocytes from HFD-fed ASO-treated mice after siRNAs treatment ( $n=3$ /group). **(b)** FGF21 levels secreted by hepatocytes from HFD-fed ASO-treated mice treated with control, *Nrf2*, *Atf4* and *Ppara* siRNAs ( $n=5$ /group). **(c)** Representative blots and densitometry of nuclear PPAR $\alpha$ , ATF4 and Histone H3 in liver of HFD-fed control ( $n=7$  and 6, respectively) and *Mat1a* ( $n=6$  and 8, respectively) ASO-treated mice. **(d)** FGF21 secreted by hepatocytes from HFD-fed ASO-treated mice exposed to 100  $\mu$ M of the PPAR $\alpha$  inhibitor, GW6471, or vehicle ( $n=5$  for each group). **(e)** FGF21 secreted by hepatocytes from HFD-fed ASO-treated mice exposed to 2  $\mu$ M of the PERK inhibitor, GSK2606414, or vehicle ( $n=5$  for each group). Values are presented as means  $\pm$  SD. Statistically significant differences between groups are indicated by \* $p < 0.05$ , \*\* $p < 0.01$  and \*\*\* $p < 0.001$  (two tailed Student's test). Source data are provided as a Source data file.

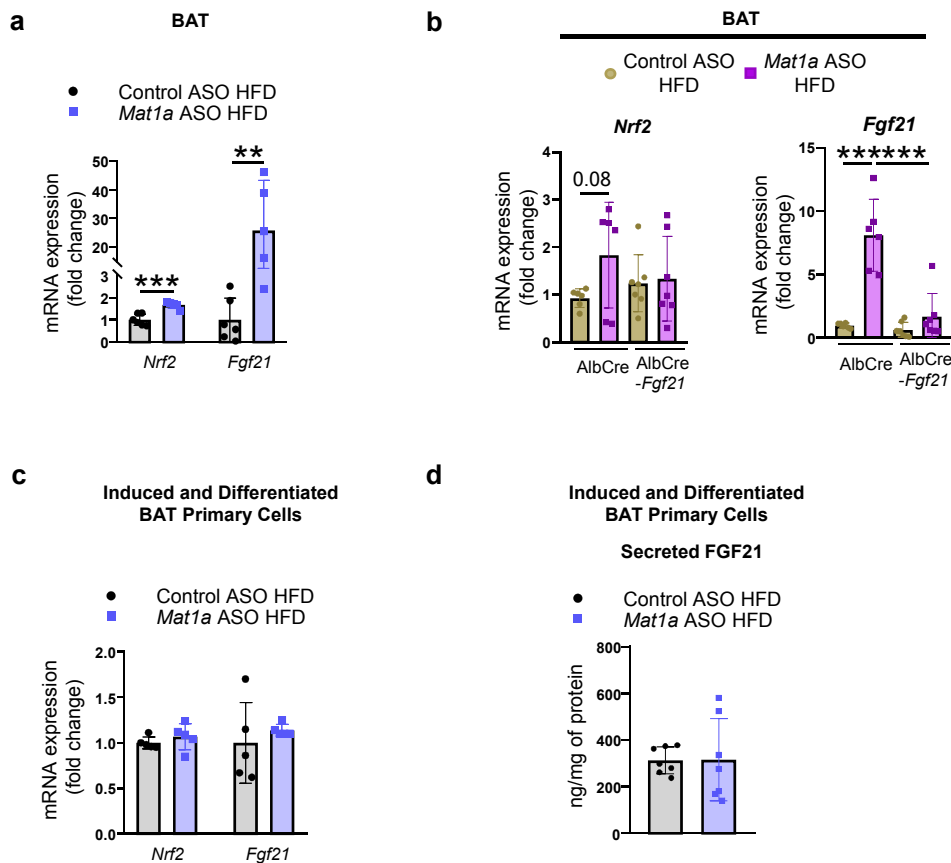

**Supplementary Figure 11. Targeting liver *Mat1a* induces expression of fibroblast growth factor 21 (*Fgf21*) in BAT.** 2-month-old C57BL/6J (C57), AlbCre and AlbCre-*Fgf21* were fed a high-fat diet (HFD) for 10 weeks. During the last 4 weeks, C57, AlbCre and AlbCre-*Fgf21* mice were treated with *Mat1a* antisense oligonucleotide (ASO) or with control ASO (25 mg/kg/week) until sacrifice. BAT primary cells were obtained from three independent HFD-fed ASO-treated C57 mice after isolation, growth in culture, induction in some cases and differentiation of adipocyte precursors. **(a)** Nuclear factor erythroid 2-related factor 2 (*Nrf2*) and *Fgf21* mRNA expression levels in BAT from HFD-fed control (n=6) and *Mat1a* (n=5) ASO-treated mice. **(b)** *Nrf2* and *Fgf21* mRNA expression levels in BAT from HFD-fed control and *Mat1a* ASO-treated AlbCre (n=6/group) and AlbCre-*Fgf21* (n=7/group) mice, respectively. **(c)** *Nrf2* and *Fgf21* mRNA expression levels in BAT primary cells (n=5/group) isolated from HFD-fed ASO-treated mice. **(d)** FGF21 levels secreted by BAT primary cells (n=7/group) isolated from HFD-fed ASO-treated mice. Values are presented as means  $\pm$  SD for histograms. Statistically significant differences between groups are indicated by \*\*p<0.01, and \*\*\*p<0.001 (two tailed Student's test). Source data are provided as a Source data file.

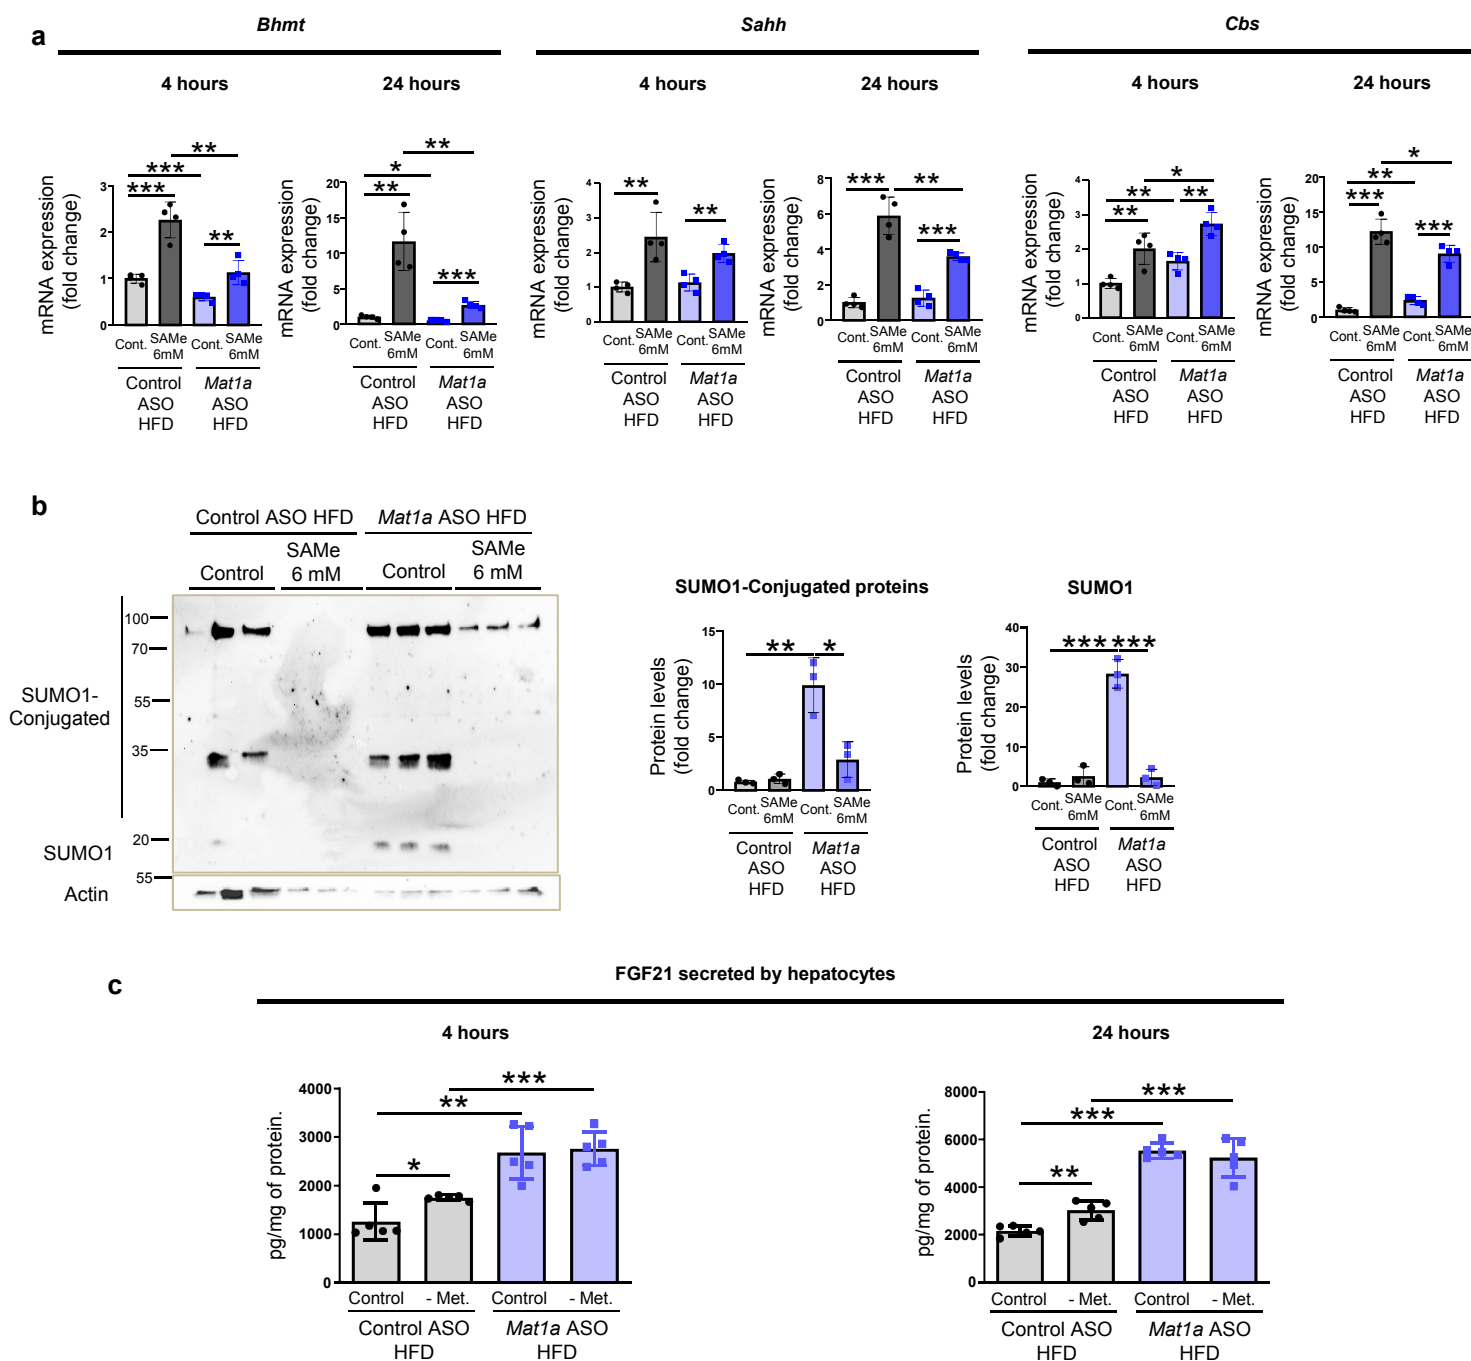

**Supplementary Figure 12. Response of hepatocytes isolated from HFD-fed ASO-treated mice to S-adenosylmethionine (SAME).** 2-month-old C57BL/6J mice were fed a high-fat diet (HFD) for 10 weeks. During the last 4 weeks mice were treated with *Mat1a* antisense oligonucleotide (ASO) or control ASO (25 mg/kg/week) until sacrifice. Hepatocytes from three different HFD-fed ASO-treated mice were isolated, seeded ( $10^6$  or 75,000 cells/well) to be cultured on a methionine deficient medium or treated with SAME (**a**) Betaine-homocysteine S-methyltransferase (*Bhmt*), S-adenosylhomocysteine hydrolase (*Sahh*) and cystathionine beta-synthase (*Cbs*) mRNA expression levels in hepatocytes from HFD-fed ASO-treated mice exposed to 6 mM of SAME for 4 and 24 hours ( $n=4$ /group). (**b**) Representative blots and densitometry of small ubiquitin-like modifier (SUMO1)-Conjugated proteins and SUMO1 levels in hepatocytes from HFD-fed ASO-treated mice exposed to 6 mM of SAME for 24 hours ( $n=3$ /group). (**c**) FGF21 secreted by hepatocytes from HFD-fed ASO-treated mice exposed to a methionine deficient medium for 4 hours and 24 hours ( $n=5$ /group). Values are presented as means  $\pm$  SD. Statistically significant differences between groups are indicated by \* $p<0.05$ , \*\* $p<0.01$ , and \*\*\* $p<0.001$  (two tailed Student's test). Source data are provided as a Source data file.
